# Supplementary material
Source: PubMed Central journal article supplement (PMC4475418)
Supplement: NIHMS689484-supplement-1.pdf [file NIHMS689484-supplement-1.pdf]

## Supplemental Figure 1

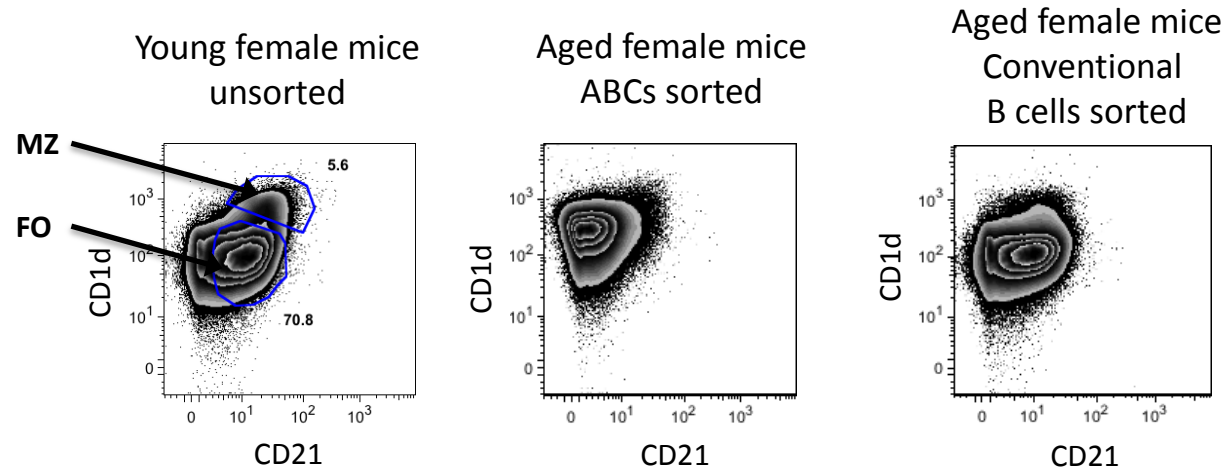

### **Supplemental Figure 1. ABCs from aged mice as differ from conventional B cell populations (FO and MZ B cells) in expression of CD1d and CD21.**

ABCs (CD3<sup>-</sup>B220<sup>+</sup>CD19<sup>+</sup>CD11c<sup>+</sup>) and conventional B cells (CD3<sup>-</sup>B220<sup>+</sup>CD19<sup>+</sup>CD11c<sup>-</sup>) were isolated from aged female mice and stained afterwards for the expression of CD21 and CD1d – surface antigens used to discriminate FO and MZ B cells. Splenocytes from young female mice were stained prior to sorting to set up correct gates for FO and MZ B cells (left panel).
