# Supplementary material
Source: PubMed Central journal article supplement (PMC4475418)
Supplement: NIHMS689484-supplement-2.pdf [file NIHMS689484-supplement-2.pdf]

## **SUPPLEMENTAL MATERIAL**

**Supplemental Movie 1. ABCs form more stable and longer interactions with T cells than FO B cells.** Multiphoton microscopy 30-min time lapse of interaction in spleen between antigen-specific T cells (labeled with VPD (blue)), antigen-pulsed ABCs (labeled with CFSE (green)) and antigen-pulsed FO B cells (labeled with CMTMR (red)). The movie is compressed from an original acquisition rate of one frame every 30 s and shows the time lapse at a rate of eight frames per second (time is shown as minutes:seconds). Data is representative of at least 3 independent time-lapse multiphoton experiments. (Scale bar = 40  $\mu\text{m}$ .)

**Supplemental Movie 2. ABCs or FO B cells do not interact with T cells in the absence of antigen.** Multiphoton microscopy 30-min time lapse of interaction in spleen between antigen-specific T cells (labeled with VPD (blue)), ABCs (labeled with CFSE (green)) and FO B cells (labeled with CMTMR (red)) in the absence of antigen. The movie is compressed from an original acquisition rate of one frame every 30 s and shows the time lapse at a rate of eight frames per second (time is shown as minutes:seconds). Data is representative of at least 3 independent time-lapse multiphoton experiments. (Scale bar = 30  $\mu\text{m}$ .)
